# Supplementary material for: Analysis of copper response in Acinetobacter sp. by comparative proteomics
Source: Royal Society of Chemistry journal article supplement (doi:10.1039/c8mt00365c), 2019-02-19
Supplement: c8mt00365c1.pdf [file c8mt00365c1.pdf]

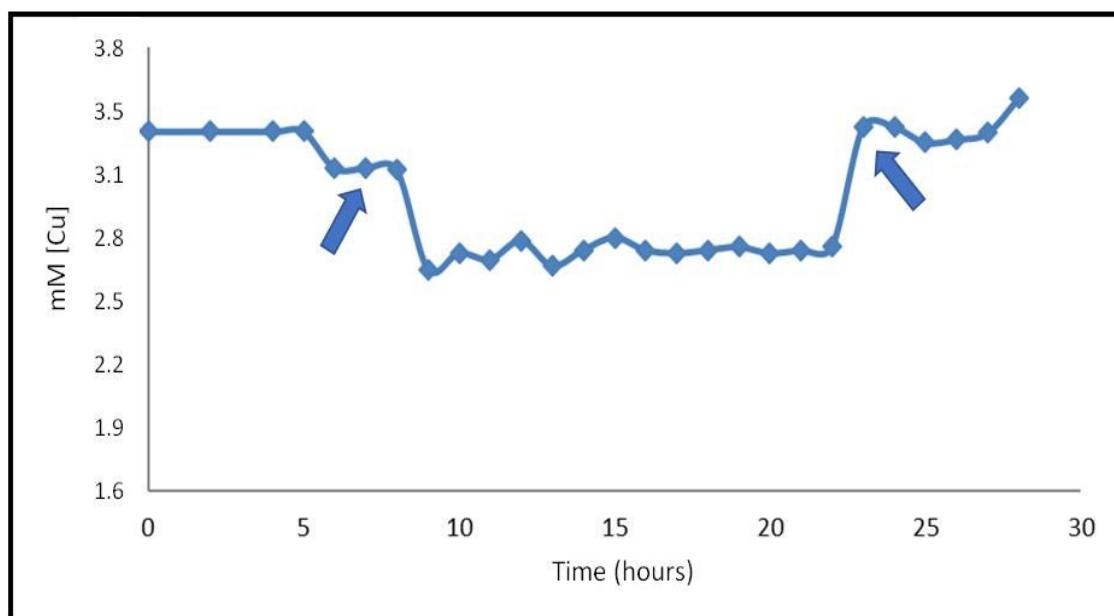

Figure A. Copper concentration in culture medium along 30 hours of cellular growth. The arrows indicate the uptake (6 hours) and efflux (24 hours) of copper in the medium culture. Concentration of copper was measured by ICP-OES, as described in EPA Method 200.7 (<http://www.epa.gov/waterscience/methods>).
